# Supplementary material
Source: PubMed Central journal article supplement (PMC3964074)
Supplement: 1320486111_pnas.201320486SI.pdf [file 1320486111_pnas.201320486SI.pdf]

# Supporting Information

Zahn et al. 10.1073/pnas.1320486111

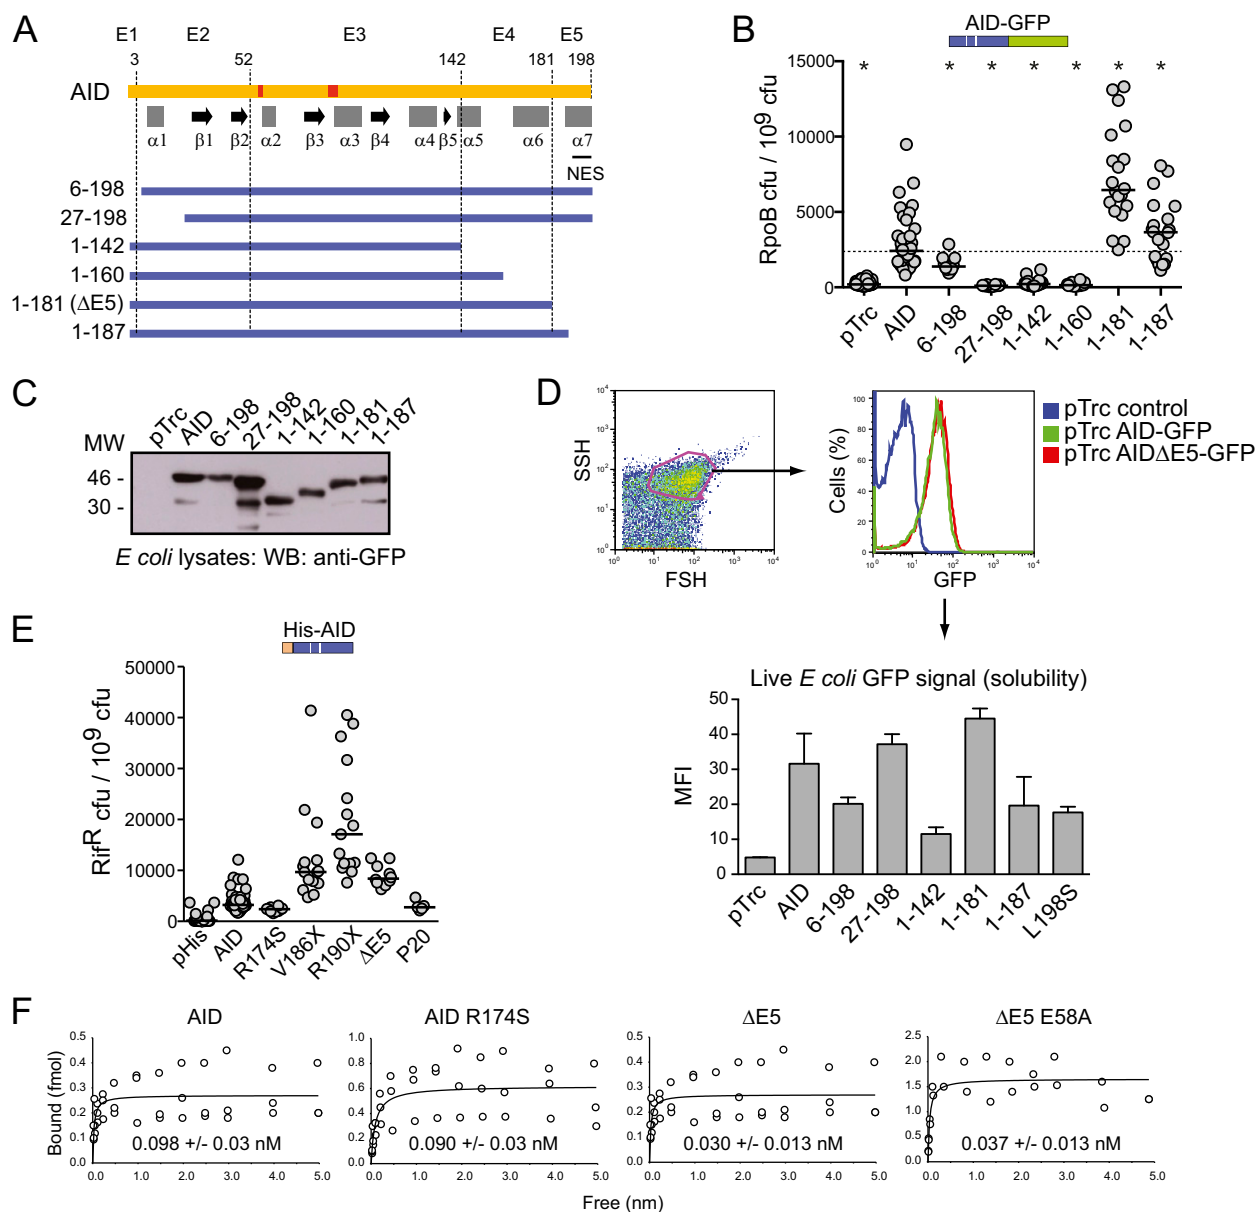

**Fig. S1.** Exon 5 (E5) is the only domain of activation-induced deaminase (AID) dispensable for enzymatic activity, and it is not required for DNA binding (related to Figs. 1 and 2). (A) Schemes of the serially truncated AID variants that were fused to the N terminus of GFP are shown below the AID scheme. Predicted secondary structure and the regions encoded by each AICDA exon (E), delimited by dotted lines with the final amino acid position noted, are indicated. NES, nuclear export signal. (B) *Escherichia coli* fluctuation assay of *rpoB* mutation frequency. Each symbol indicates the Rif<sup>R</sup> cfu in an independent culture expressing AID-GFP variants. pTrc, empty vector control. Data from two to four independent experiments for each variant are compiled, with median values indicated by horizontal lines and significant differences compared with AID (*P* values by Kruskal–Wallis test with Dunnett multiple test comparison;  $\alpha < 0.05$ ). (C) Relative expression of each AID-GFP variant protein in total extracts of induced *E. coli* cultures determined by Western blot (WB). MW, molecular weight markers. (D) Relative expression of each AID-GFP variant determined by flow cytometry in live *E. coli* cultures. The gating strategy and GFP signal for representative cultures are shown. SSC-H, side scatter; FSC-H, forward scatter. Mean + SD of the mean fluorescent intensity (MFI) of GFP in three to five induced cultures is plotted. This measurement provides an estimation of the relative expression of soluble protein for each AID variant, because precipitation of the fusion protein would inactivate GFP (1). (E) The actual *rpoB* mutation frequencies of the *E. coli* fluctuation assays that are presented as normalized to AID in Fig. 2A are plotted as in A. pHis, empty vector control. (F) DNA binding capacity of AID variants was determined by EMSA and quantified. The results of three experiments are plotted with the fitted average curve and derived mean ± SD.  $K_d$  values.

1. Delker RK, Zhou Y, Strikoudis A, Stebbins CE, Papavasiliou FN (2013) Solubility-based genetic screen identifies RING finger protein 126 as an E3 ligase for activation-induced cytidine deaminase. *Proc Natl Acad Sci USA* 110(3):1029–1034.

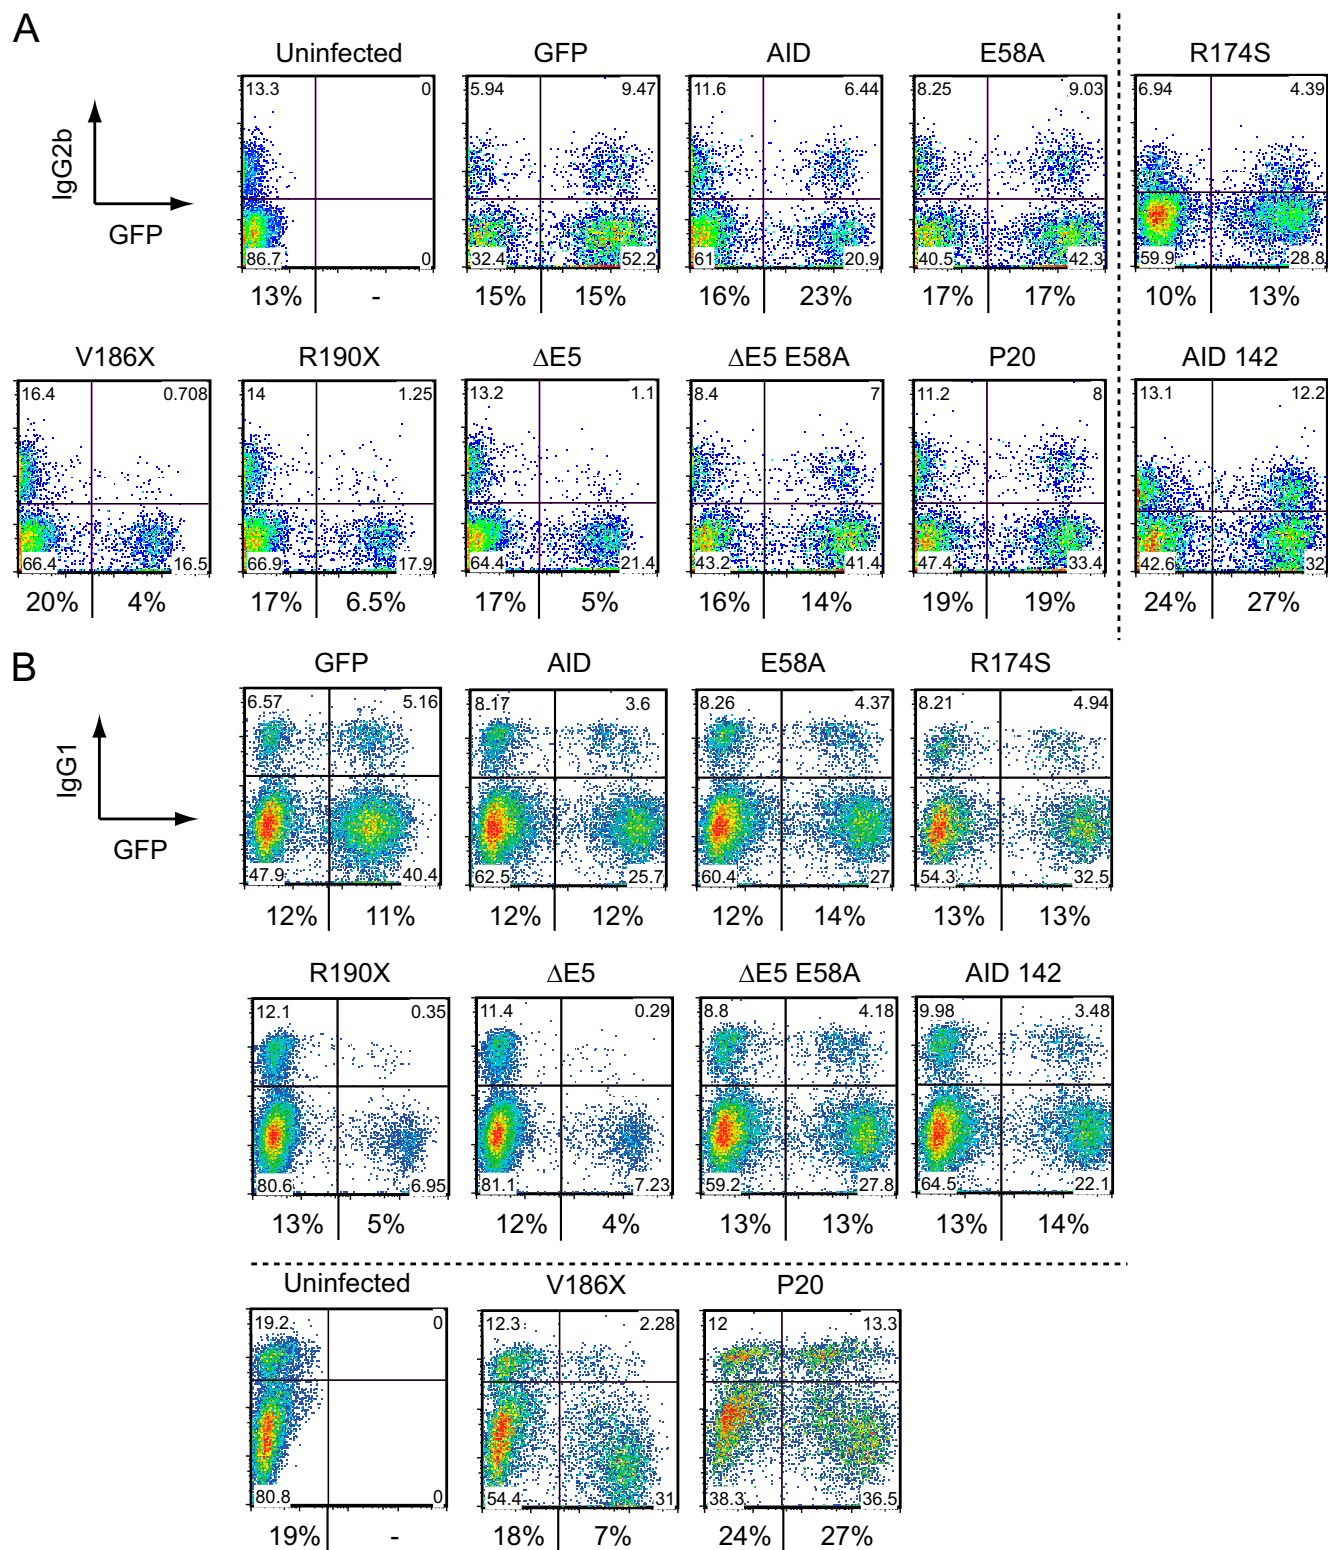

**Fig. S2.** Representative flow cytometry profiles for class switch recombination (CSR) dominant-negative assays (related to Fig. 1). (A) IgG2b CSR assays in WT (*Aicda*<sup>+/+</sup>) B cells retrovirally transduced with the indicated AID variants-ires-GFP vectors. (B) IgG1 CSR assays in *Aicda*<sup>+/+</sup> B cells as in A. Plots coming from different experiments are separated by dotted lines. When staining and gating are different, selected controls are presented for comparison. The frequency of each gate is indicated. The proportion of switched cells in GFP<sup>-</sup> (untransduced) and GFP<sup>+</sup> (transduced) B cells was calculated and is indicated below the corresponding region.



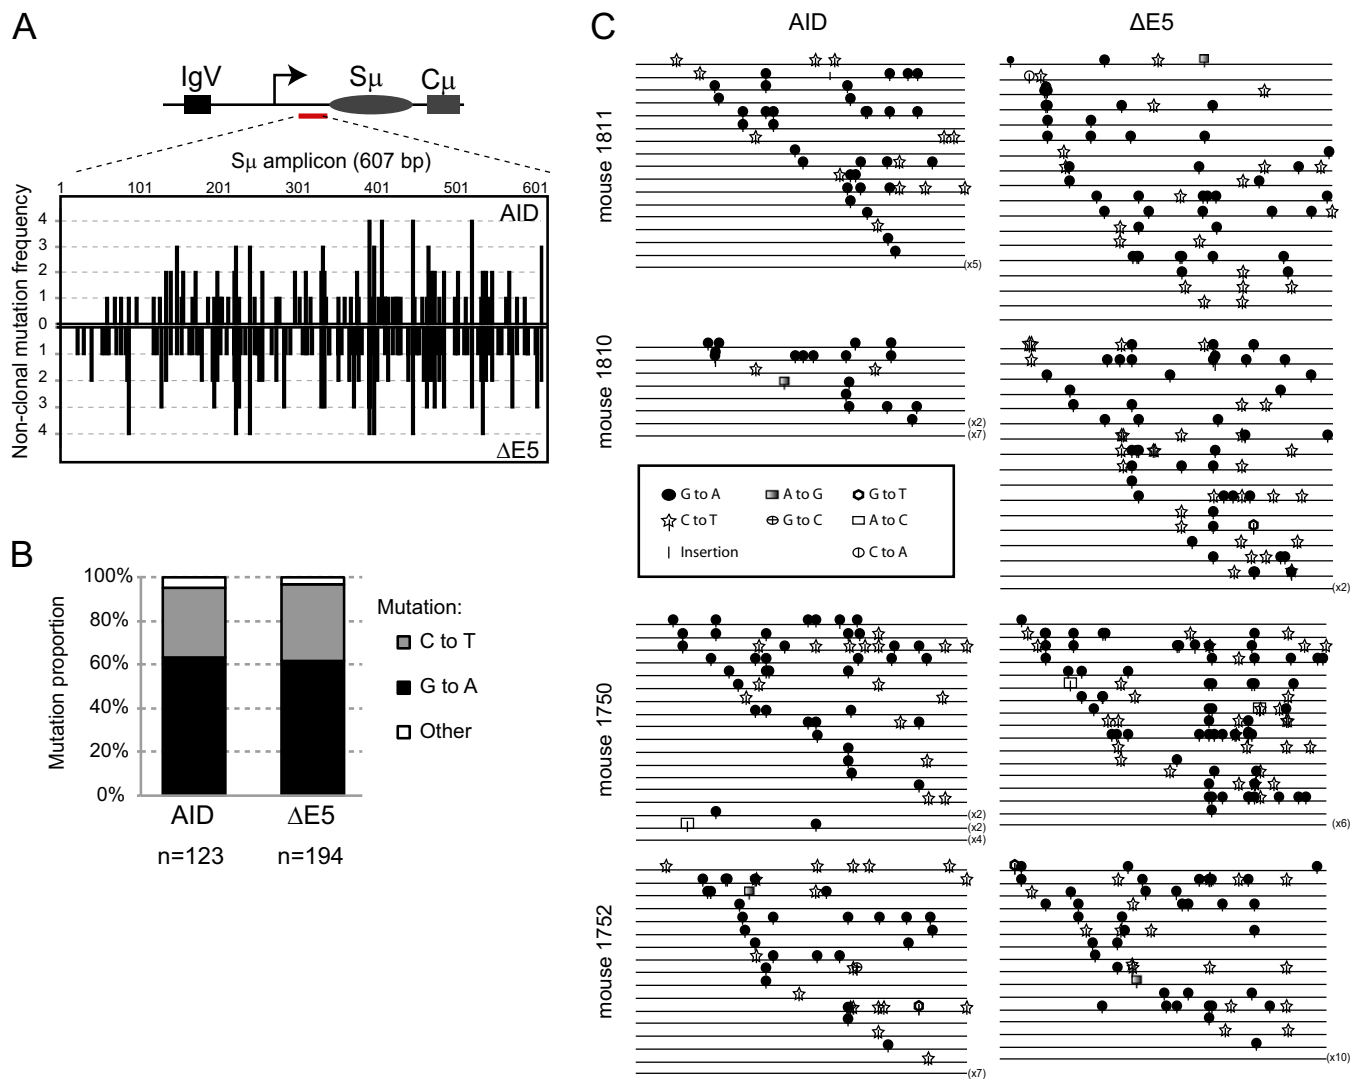

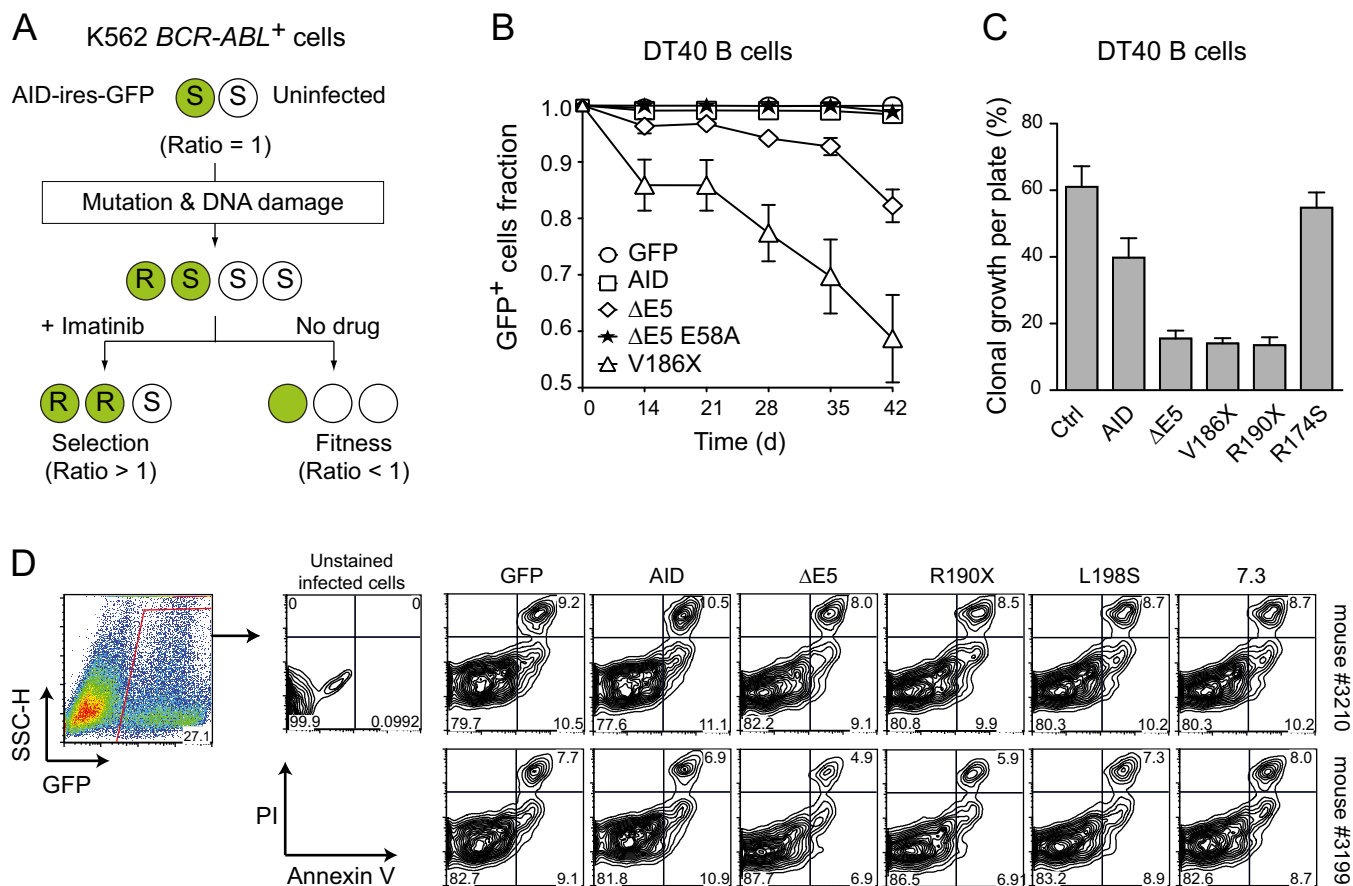

**Fig. S5.** AID variants with truncated E5 hinder B-cell expansion but do not increase apoptosis (related to Fig. 3). (A) Schematics of the assays performed in K562 *BCR-ABL*<sup>+</sup> chronic myelogenous leukemia cells. K562 cells originally sensitive (S) to imatinib were transduced with AID-ires-GFP retroviral vectors and mixed at a 1:1 ratio with untransduced parental cells. AID variants mutate the *BCR-ABL*, and some of the mutations render *BCR-ABL* kinase resistant to the imatinib inhibitor. GFP signal is periodically monitored by flow cytometry. When grown in the presence of imatinib as the selection agent, an increased ratio of GFP<sup>+</sup> (transduced) to GFP<sup>−</sup> (untransduced) cells indicates the acquisition of imatinib resistance (R) through AID-dependent mutations at *BCR-ABL*. However, growing the cells without any selection reveals the relative effect of each AID variant on cell fitness. (B) Expression stability of the indicated AID variants transduced into DT40 B-cell lines. The expression of each variant is linked through an ires sequence to GFP expression that was monitored by flow cytometry over time after infection in the absence of any selection. (C) Clonal growth capacity of sorted *Aicda*<sup>−/−</sup> DT40 B cells complemented with the indicated AID variants was determined by single cell deposition in 96-well plates. Bars indicate mean + SD of the proportion of wells with viable clones 2 wk after sorting for three plates per construct. Ctrl, control. (D) Apoptosis was measured in retrovirally complemented *Aicda*<sup>−/−</sup> B cells 24 h after infection by Annexin V and propidium iodide (PI) staining. SSC-H, side scatter. One representative of at least two experiments performed with B cells from two mice for each construct are shown.

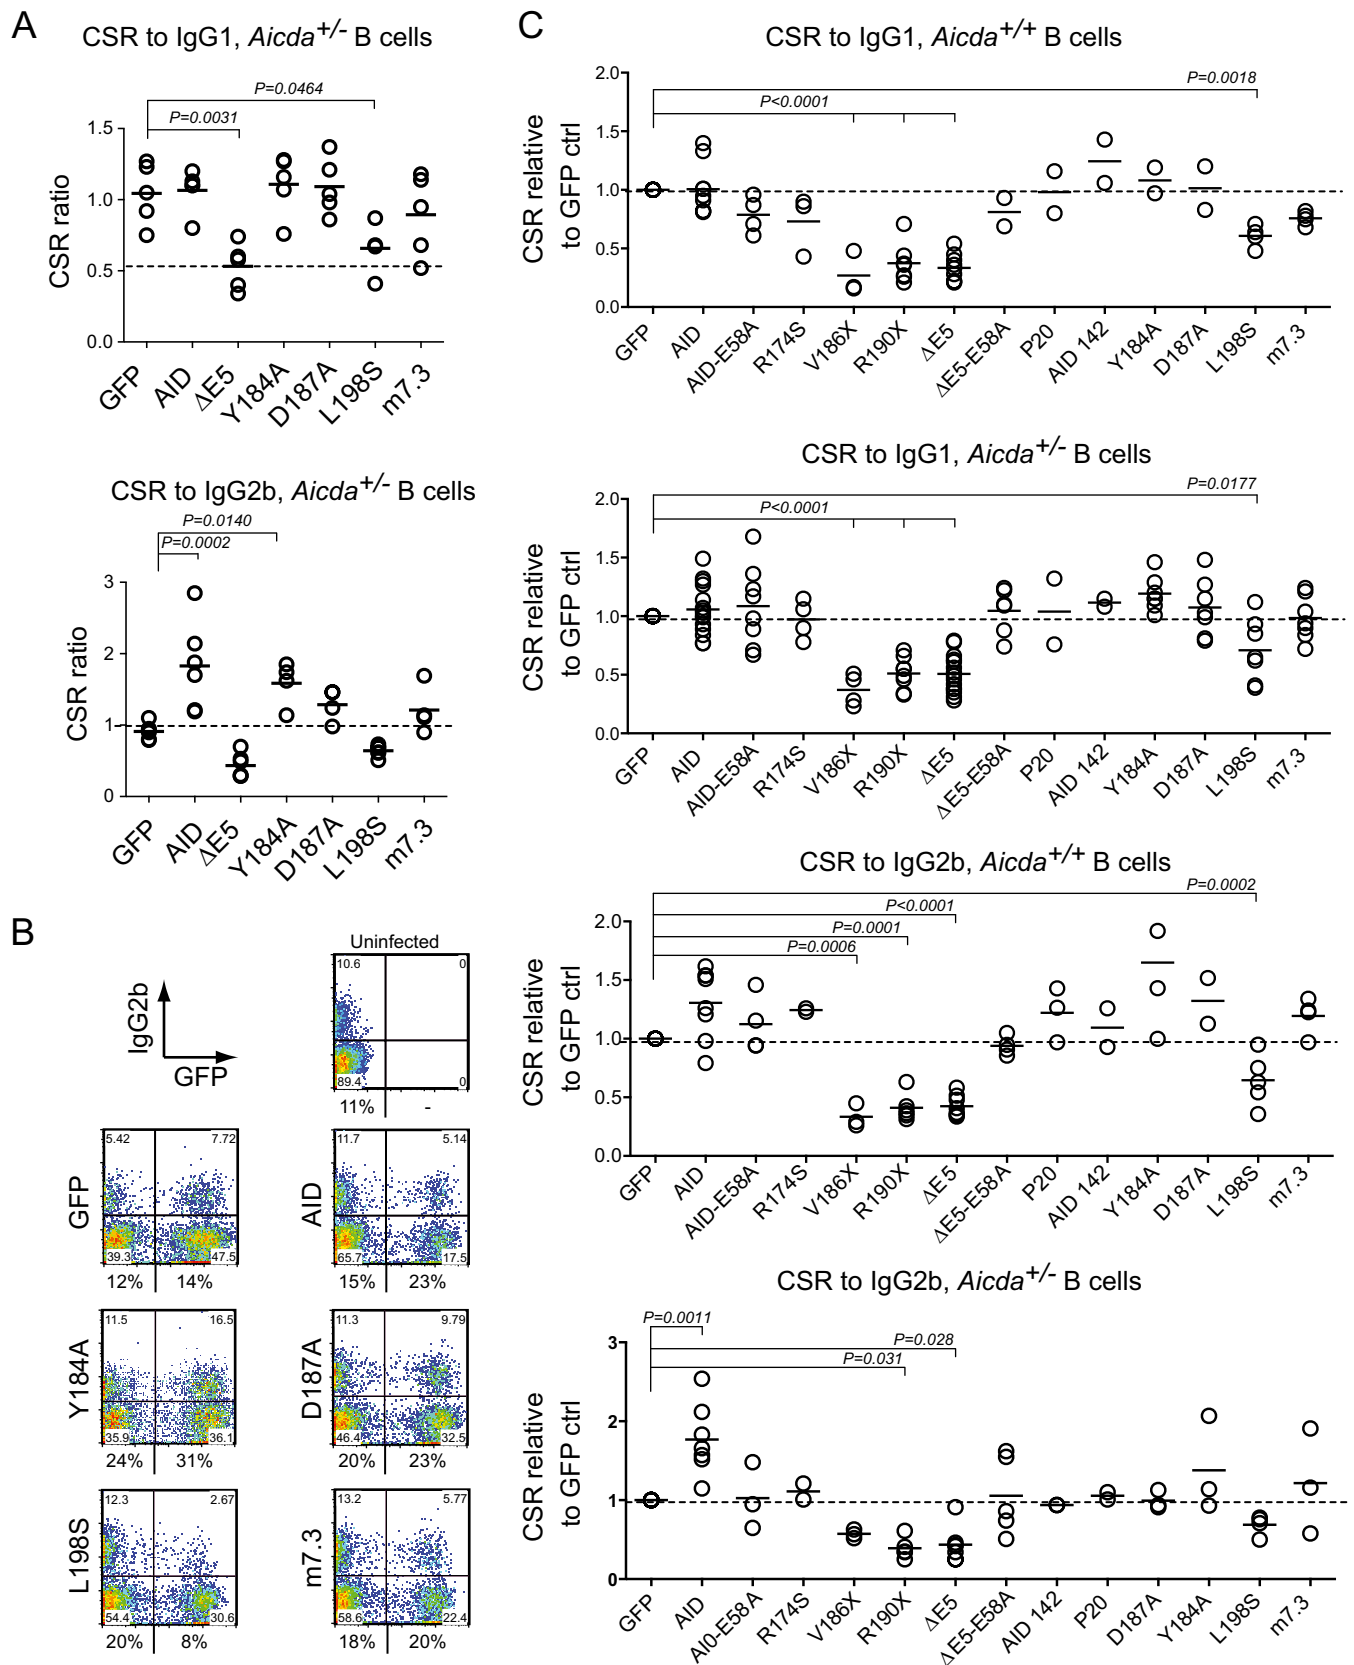

**Fig. S6.** Dominant-negative behavior of artificial AID point mutants and alternative calculation for the dominant-negative effect (related to Figs. 1 and 4). (A) Compiled CSR ratios for IgG1 and IgG2b in *Aicda*<sup>+/-</sup> B cells transduced with the indicated AID variants. Each symbol is the ratio between the proportion of switched cells in the infected (GFP<sup>+</sup>; expressing the indicated AID variant) and uninfected (GFP<sup>-</sup>) fractions of B cells from an individual mouse. A ratio of one is marked by a dotted line. Means are indicated by horizontal bars. Significant *P* values from one-way ANOVA with Dunnett multiple comparisons test are

Legend continued on following page



**Table S1. Description and summary of the activities of the AID mutants included in this work**

| Name             | Origin     | Structure description                                                           | <i>RpoB</i><br>mutation<br><i>E. coli</i> | <i>IgV</i> SHM<br>DT40 | In vitro<br>CSR B cells | $\gamma$ H2AX<br>foci<br>HeLa | CSR<br>dominant<br>negative | Source    |
|------------------|------------|---------------------------------------------------------------------------------|-------------------------------------------|------------------------|-------------------------|-------------------------------|-----------------------------|-----------|
| AID              |            | WT human AID                                                                    | +++                                       | +++                    | +++                     | –                             | No                          | 1         |
| AID-E58A         | Artificial | Full-length, Asp58 > Ala                                                        | –                                         | –                      | –                       | –                             | No                          | 2         |
| R174S            | AR HIGM2   | Full-length, Arg174 > Ser                                                       | +/-                                       | –                      | –                       | –                             | No                          | 3         |
| V186X            | AD HIGM2   | Truncated form, residues 1–185                                                  | ++++++                                    | ++++++                 | +/-                     | +                             | Yes                         | 4         |
| R190X            | AD HIGM2   | Truncated form, residues 1–189                                                  | ++++++                                    | ++++++                 | +/-                     | +                             | Yes                         | 5         |
| $\Delta$ E5      | Artificial | Truncated form, residues 1–181                                                  | ++++++                                    | ++++++                 | +/-                     | +                             | Yes                         | 2         |
| $\Delta$ E5-E58A | Artificial | Truncated form, residues 1–181,<br>Asp58 > Ala                                  | –                                         | –                      | –                       | –                             | No                          | This work |
| 142              | Artificial | Truncated form, residues 1–142                                                  | –                                         | –                      | –                       | –                             | No                          | This work |
| P20              | AR HIGM2   | Insertion,<br>Leu181 Pro182 34 residues<br>(VTKPSTQFRRLSGPTDPQPRFEAIHSICFSLSLR) | +/-                                       | ND                     | –                       | –                             | No                          | 6         |
| Y184A            | Artificial | Full-length, Tyr184 > Ala                                                       | ++++                                      | +++                    | +++                     | –                             | No                          | This work |
| D187A            | Artificial | Full-length, Asp187 > Ala                                                       | ++                                        | +++                    | +++                     | –                             | No                          | 2         |
| m7,3             | Artificial | Full-length, Lys10 > Glu, Thr82 ><br>Ile, Glu156 > Gly                          | ++++++                                    | ++++++                 | +++                     | –                             | No                          | 7         |
| L198S            | Artificial | Full-length, Leu198 > Ser                                                       | ++++++                                    | ++++++                 | +/-                     | +                             | Yes                         | 2         |

AD, autosomal dominant; AR, autosomal recessive; HIGM2, hyper-IgM immunodeficiency syndrome; *IgV*, Ig variable exon; ND, not done; SHM, somatic hypermutation.

1. Muramatsu M, et al. (1999) Specific expression of activation-induced cytidine deaminase (AID), a novel member of the RNA-editing deaminase family in germinal center B cells. *J Biol Chem* 274(26):18470–18476.
2. Patenaude A-M, et al. (2009) Active nuclear import and cytoplasmic retention of activation-induced deaminase. *Nat Struct Mol Biol* 16(5):517–527.
3. Quartier P, et al. (2004) Clinical, immunologic and genetic analysis of 29 patients with autosomal recessive hyper-IgM syndrome due to Activation-Induced Cytidine Deaminase deficiency. *Clin Immunol* 110(1):22–29.
4. Durandy AH, Taubenheim N, Péron S, Fischer A (2007) Pathophysiology of B-cell intrinsic immunoglobulin class switch recombination deficiencies. *Adv Immunol* 94:275–306.
5. Imai K, et al. (2005) Analysis of class switch recombination and somatic hypermutation in patients affected with autosomal dominant hyper-IgM syndrome type 2. *Clin Immunol* 115(3):277–285.
6. Ta V-T, et al. (2003) AID mutant analyses indicate requirement for class-switch-specific cofactors. *Nat Immunol* 4(9):843–848.
7. Wang M, Yang Z, Rada C, Neuberger MS (2009) AID upmutants isolated using a high-throughput screen highlight the immunity/cancer balance limiting DNA deaminase activity. *Nat Struct Mol Biol* 16(7):769–776.
